# Supplementary material
Source: HighWire-hosted journal article supplement (https://www.cancerbiomed.org/content/19/9/1385)
Supplement: media-1 [file media-1.pdf]

# Supplementary materials

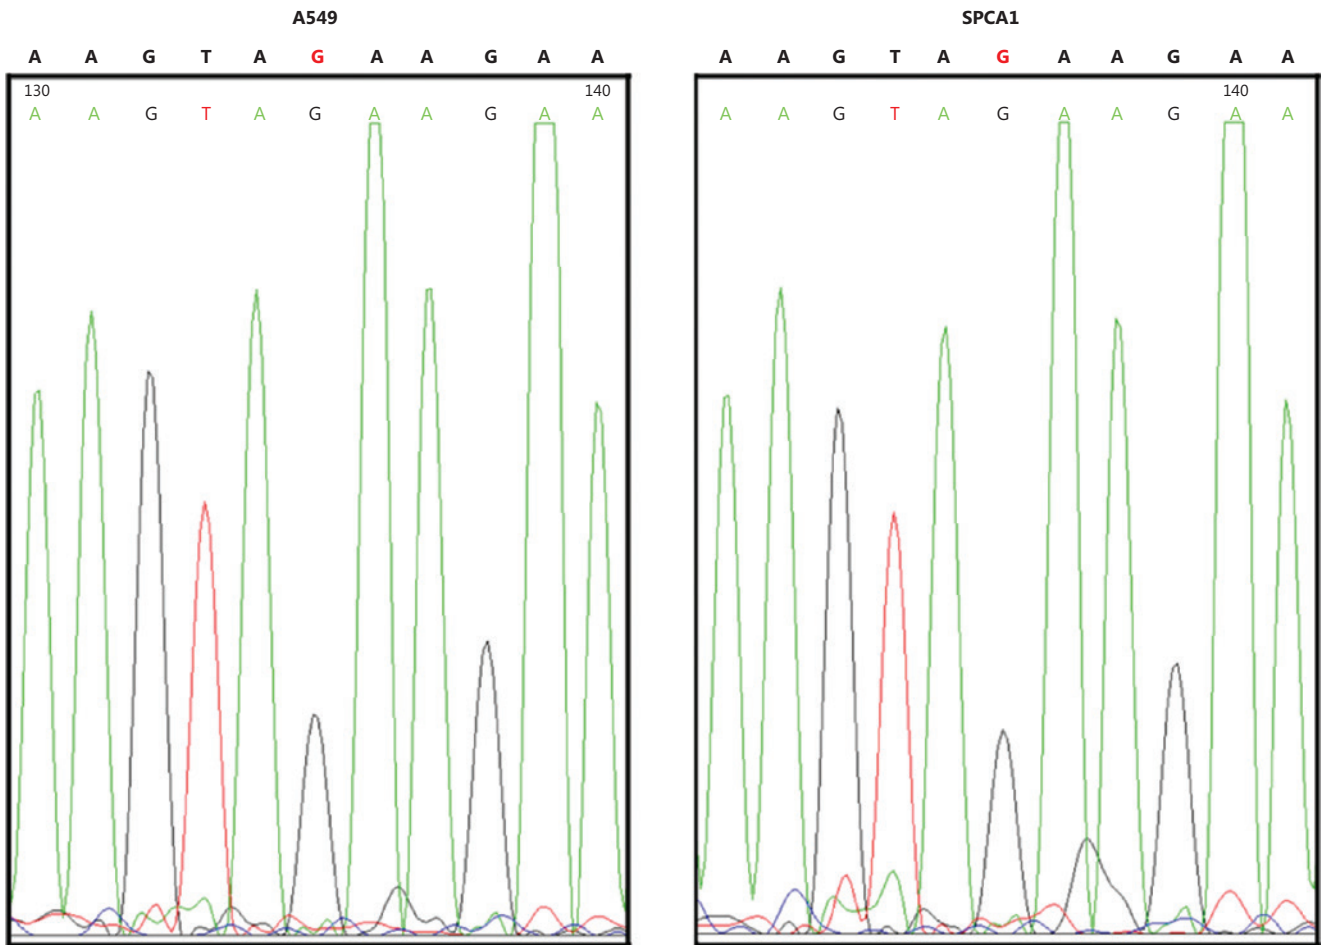

**Figure S1** Sanger sequencing of A549 and SPCA1 cell lines.

**Table S1** Primers for qRT-PCR

| Genes          | Forward or reverse | Primer sequence                |
|----------------|--------------------|--------------------------------|
| PCNA           | Forward            | 5'-ATGCCTTCTGGTGAATTTGC-3'     |
|                | Reverse            | 5'-TCACTCCGTCTTTGCACAG-3'      |
| MMP9           | Forward            | 5'-AAGGCGCAGATGGTGGAT-3'       |
|                | Reverse            | 5'-TCAACTCACTCCGGAACTC-3'      |
| MMP27          | Forward            | 5'-TTGTTTCTTGTGGCTGCTCA-3'     |
|                | Reverse            | 5'-GCTAAGCCAAAGGAACCCAC-3'     |
| Caspase-3      | Forward            | 5'-CATGGAAGCGAATCAATGGACT-3'   |
|                | Reverse            | 5'-CTGTACCAGACCGAGATGTCA-3'    |
| Bax            | Forward            | 5'-TTCTGACGGCAACTTCAACTGG-3'   |
|                | Reverse            | 5'-CACAGGGCCTTGAGCACC-3'       |
| Bcl2           | Forward            | 5'-CCCGCGACTCCTGATTCATT-3'     |
|                | Reverse            | 5'-CAGTCTACTTCTCTGTGATGTTGT-3' |
| $\beta$ -actin | Forward            | 5'-CTGGGACGACATGGAGAAAA-3'     |
|                | Reverse            | 5'-AAGGAAGGCTGGAAGAGTGC-3'     |
